# Supplementary material for: Glutathionylation potentiates benign superoxide dismutase 1 variants to the toxic forms associated with amyotrophic lateral sclerosis
Source: PubMed Central journal article supplement — Sci Rep. 2013 Nov 20;3:3275. doi: 10.1038/srep03275 (PMC3834562; doi:10.1038/srep03275), 2013-11-20
Supplement: srep03275-s1.pdf [file srep03275-s1.pdf]

**Manuscript Title:**

Glutathionylation potentiates benign superoxide dismutase 1 variants to the toxic forms responsible for amyotrophic lateral sclerosis progression

**Authors (in the following order):**

Luke McAlary<sup>1,2</sup>, Justin J. Yerbury<sup>1,2</sup> and J. Andrew Aquilina<sup>1,2,\*</sup>

*<sup>1</sup>Illawarra Health and Medical Research Institute, <sup>2</sup>School of Biological Sciences, University of Wollongong, Northfields Avenue, Wollongong NSW, Australia 2522*

**Email addresses of authors:**

L. McAlary: [lm259@uowmail.edu.au](mailto:lm259@uowmail.edu.au); J. J. Yerbury: [jyerbury@uow.edu.au](mailto:jyerbury@uow.edu.au);

J.A. Aquilina: [aquilina@uow.edu.au](mailto:aquilina@uow.edu.au)

**\*Author for correspondence:**

J. Andrew Aquilina

Illawarra Health and Medical Research Institute,

University of Wollongong,

Northfields Avenue,

Wollongong, NSW, AUSTRALIA 2522

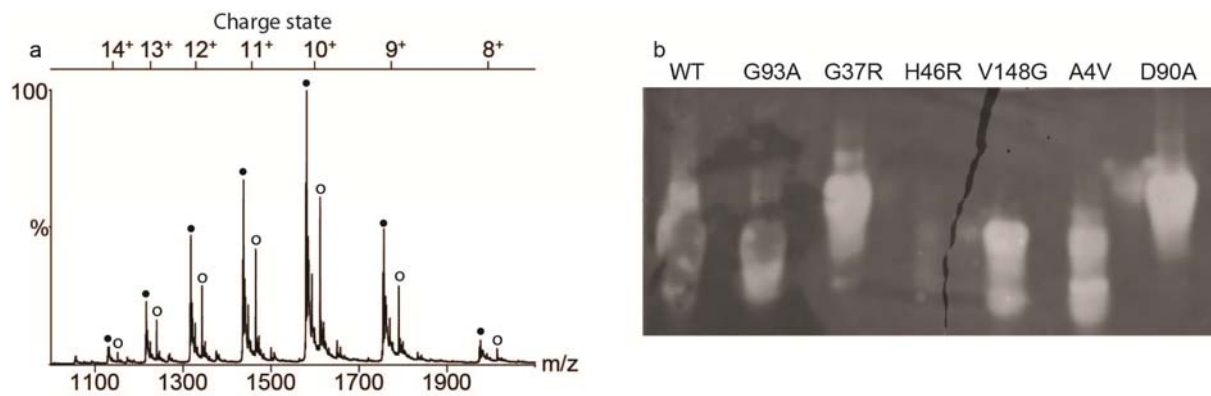

**Supplementary Figure 1 | Mass analysis of SOD1 and in-gel-zymography.** (A) SOD1 was fully unfolded in acidic solvent before mass analysis for the accurate mass identification of covalent modifications. The two major species observed were *u*SOD1 (closed circle) and *gs*SOD1 (open circle). (B) Native-PAGE electrophoresis of SOD1. The gel was assayed for dismutase activity. Dismutase activity is denoted by achromatic bands.

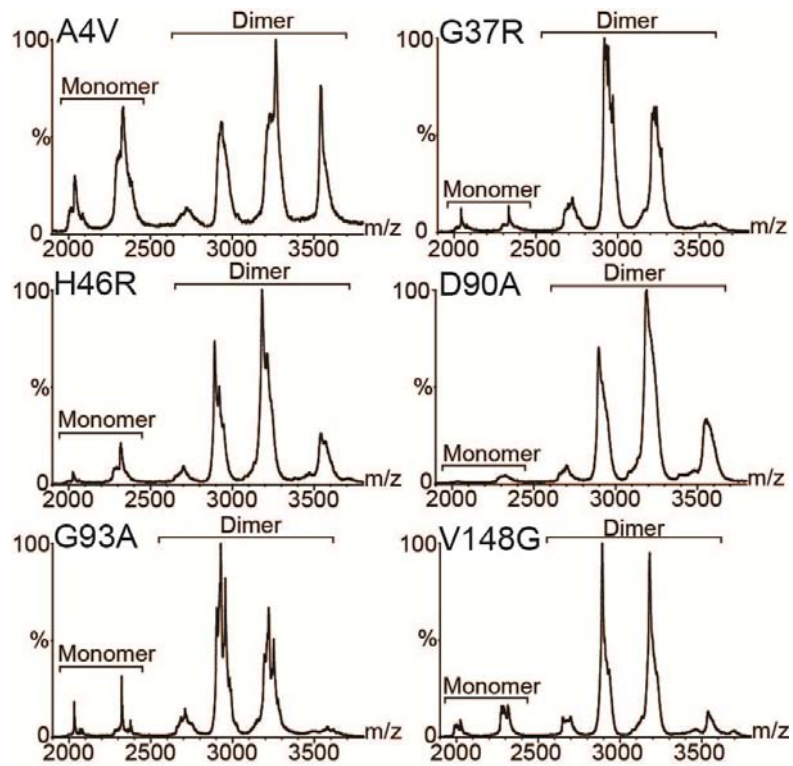

**Supplementary Figure 2 | Mass of native SOD1 variants.** SOD1 variants were analysed using mass spectrometry under gentle conditions to maintain their native state. All SOD1 variants showed an abundance of dimer in the 10+ and 11+ charge states, with substantially lower abundance in the 9+ and 12+ charge states. Solution phase monomer was confined to the 7+ and 8+ charge states.

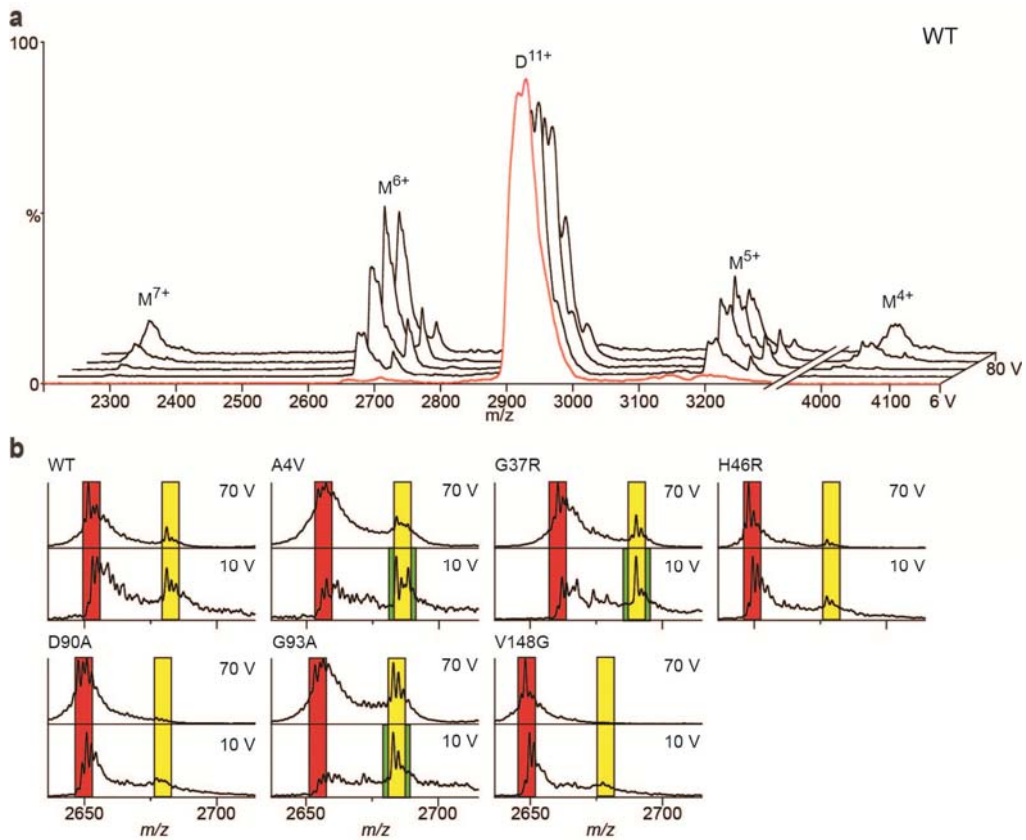

**Supplementary Figure 3 | Tandem mass spectrometry of SOD1 variants.** (a) Progressive dissociation of the 11+ charge state of the dimer resulted in the evolution of monomer primarily in the 6+ and 5+ charge states, with minor amounts in 7+ and 4+ charge states. (b) Analysis of the  $M^{6+}$  ion at collision energies of 10 and 70 V, comparing *uSOD1* (red) to *gsSOD1* (yellow). Variants that have a greater *gsSOD1* ion abundance relative to *uSOD1* at 10 V (i.e., *gsSOD1* subunit dissociation is more facile) are marked with a green border (A4V, G37R, and G93A).

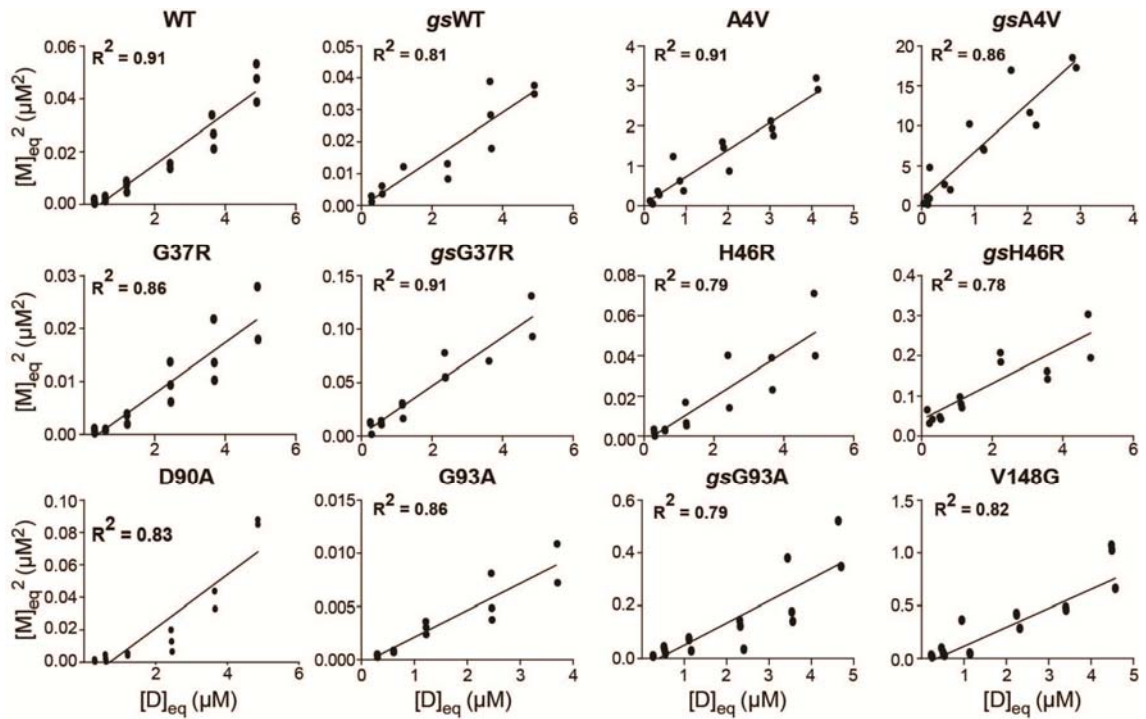

**Supplementary Figure 4 | Determination of  $K_d$  values.** Plots of  $[D]_{eq}$  against  $[M]_{eq}^2$  revealing  $K_d$  values for uSOD1 and gsSOD1 variants. Least squares regression ( $R^2$ ) is shown.  $K_d$  is derived from the line of best fit gradient (See supplementary table 1.)

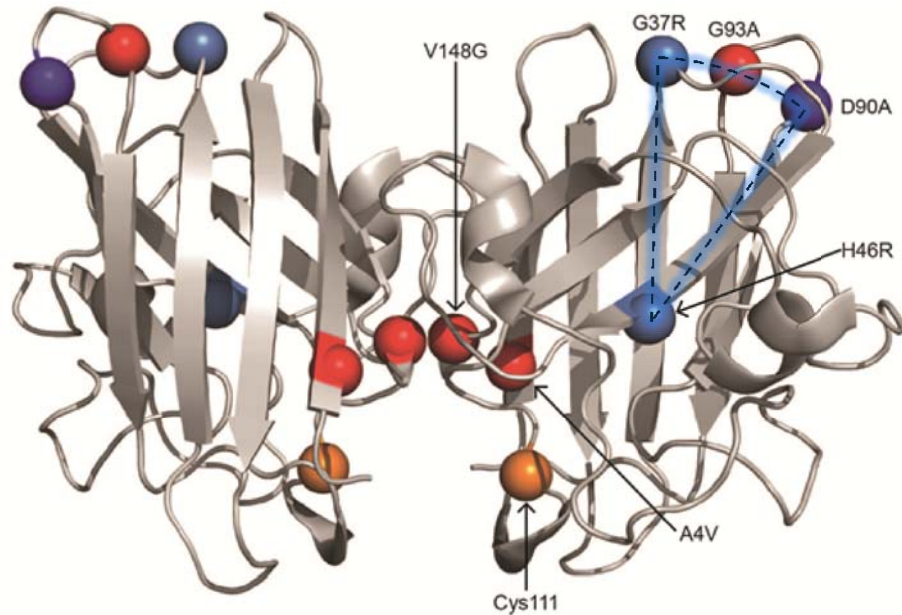

**Supplementary Figure 5 | Location of mutations on the SOD1 dimer.** Residues are colour coded according to severity of disease progression associated with the mutation. Red represents rapid disease progression (< 5 years), and blue represents slow (>5 years). Residue Cys111 is marked orange. (PDB file: 2V0A adapted from Strange et. al. 2007). Residues of the mutants tested, which have wildtype-like  $K_d$  prior to glutathionylation, are seen to be arranged in a two-dimensional molecular plane orthogonal to the  $\beta$ -barrel polar axis.
